# Supplementary material for: Development of strategies to support home-based exercise adherence after stroke: a Delphi consensus
Source: HighWire-hosted journal article supplement (doi:10.1136/bmjopen-2021-055946), 2022-01-01
Supplement: bmjopen-2021-055946supp002_data_supplement.pdf [file bmjopen-2021-055946supp002_data_supplement.pdf]

**Supplementary file 2: Level of agreement between experts on uncertain strategies in Round 2**

| <b>S. No</b> | <b>Unsure strategies</b>                                               | <b>Agreeing experts, n (%) (N=11)</b> | <b>Strategy included for the next round</b> |
|--------------|------------------------------------------------------------------------|---------------------------------------|---------------------------------------------|
| 1.           | Activity log/scheduling                                                | 8 (73)                                | Included                                    |
| 2.           | Award function every two months                                        | 3 (27)                                | Excluded                                    |
| 3.           | Certain use of aids may help them for better balance and self-efficacy | 4 (36)                                | Excluded                                    |
| 4.           | Circuit training                                                       | 1 (9)                                 | Excluded                                    |
| 5.           | Coaching methodology                                                   | 7 (64)                                | Included                                    |
| 6.           | Competition for caregivers and family                                  | 2 (18)                                | Excluded                                    |
| 7.           | Contingency charts /plan                                               | 9 (82)                                | Included                                    |
| 8.           | Devise color bands coded for level of recovery and mastery of tasks    | 7 (64)                                | Included                                    |
| 9.           | Information on stroke type and location                                | 4 (36)                                | Excluded                                    |
| 10.          | Home movies for family viewing                                         | 4 (36)                                | Excluded                                    |
| 11.          | Individualized program                                                 | 9 (82)                                | Included                                    |
| 12.          | Involving group sessions                                               | 7 (64)                                | Included                                    |
| 13.          | mHealth                                                                | 7 (64)                                | Included                                    |
| 14.          | Participation in social events                                         | 4 (36)                                | Excluded                                    |
| 15.          | Peer support/exercise buddies                                          | 8 (73)                                | Included                                    |
| 16.          | Pie chart for social and emotional impact on the patients              | 3 (27)                                | Excluded                                    |
| 17.          | Posters in the waiting area                                            | 7 (64)                                | Included                                    |
| 18.          | Provide tokens and badges for improvement                              | 8 (73)                                | Included                                    |
| 19.          | Psychoeducation                                                        | 9 (82)                                | Included                                    |
| 20.          | Regular check by neighbors                                             | 1 (9)                                 | Excluded                                    |
| 21.          | Rotate family members in caregiving                                    | 8 (73)                                | Included                                    |
| 22.          | Task-oriented therapy                                                  | 8 (73)                                | Included                                    |
| 23.          | Virtual reality                                                        | 4 (36)                                | Excluded                                    |
| 24.          | Wall of fame/display board                                             | 7 (64)                                | Included                                    |
| 25.          | Whatsapp group                                                         | 4 (36)                                | Excluded                                    |
