# Supplementary material for: Development of strategies to support home-based exercise adherence after stroke: a Delphi consensus
Source: HighWire-hosted journal article supplement (doi:10.1136/bmjopen-2021-055946), 2022-01-01
Supplement: bmjopen-2021-055946supp003_data_supplement.pdf [file bmjopen-2021-055946supp003_data_supplement.pdf]

### Supplementary file 3: Framework of strategies for facilitating home-based exercise adherence post stroke

| S.no | Domain                                     | Strategies                                                                                                                                                                                                                                                                                                                                                                                                                                                                                                                                                                                                                                                                                                                                                                                                                                                                                                                                                                                                                    | Healthcare provider                                                                                                                           | Stakeholder        |
|------|--------------------------------------------|-------------------------------------------------------------------------------------------------------------------------------------------------------------------------------------------------------------------------------------------------------------------------------------------------------------------------------------------------------------------------------------------------------------------------------------------------------------------------------------------------------------------------------------------------------------------------------------------------------------------------------------------------------------------------------------------------------------------------------------------------------------------------------------------------------------------------------------------------------------------------------------------------------------------------------------------------------------------------------------------------------------------------------|-----------------------------------------------------------------------------------------------------------------------------------------------|--------------------|
| 1    | <b>Education about stroke and recovery</b> | <ul style="list-style-type: none"> <li>• Education on usual time course and speed of recovery after stroke</li> <li>• Impact of practice and exercise on recovery</li> <li>• Negative effects of rest and positive effects of activity on stroke recovery</li> <li>• Importance of secondary risks management</li> <li>• Managing complications (e.g., spasticity, pain, fatigue, contracture, depression and cognitive changes)</li> <li>• Awareness on interventions without evidence (including traditional medicines and religious practices)</li> <li>• Importance of adhering to the exercise program</li> <li>• Dosage of the exercise program</li> <li>• Information about expected outcomes based on severity</li> <li>• Proper positioning techniques</li> <li>• Misconceptions about stroke recovery</li> <li>• Role of a caregiver</li> </ul> <p>Education can be delivered via written information, group sessions, individual discussions, testimonials from recovered patients and caregivers, phone calls</p> | Exercise therapist (Physiotherapist, Occupational therapists, Psychiatrist, Stroke nurse)<br>Licensed psychologist trained in health behavior | Patient, Caregiver |
|      | <b>Domain</b>                              | <b>Strategies</b>                                                                                                                                                                                                                                                                                                                                                                                                                                                                                                                                                                                                                                                                                                                                                                                                                                                                                                                                                                                                             | <b>Healthcare provider</b>                                                                                                                    | <b>Stakeholder</b> |

|   |                              |                                                                                                                                                                                                                                                                                                                                                                                                                                                                                                                                                                                                                                                                                                                                                                                                                                                                                                                                                                                                                                                                                                                                                                               |                                                                                                                                                          |                    |
|---|------------------------------|-------------------------------------------------------------------------------------------------------------------------------------------------------------------------------------------------------------------------------------------------------------------------------------------------------------------------------------------------------------------------------------------------------------------------------------------------------------------------------------------------------------------------------------------------------------------------------------------------------------------------------------------------------------------------------------------------------------------------------------------------------------------------------------------------------------------------------------------------------------------------------------------------------------------------------------------------------------------------------------------------------------------------------------------------------------------------------------------------------------------------------------------------------------------------------|----------------------------------------------------------------------------------------------------------------------------------------------------------|--------------------|
| 2 | <b>Exercise prescription</b> | <ul style="list-style-type: none"> <li>• Relevant exercises for each persons' goals and context</li> <li>• Individually-tailored exercises</li> <li>• Contingency plan and including enough opportunities for independent and autonomous activities</li> <li>• Personalized information/messages on the exercise prescription</li> <li>• Fun and engaging such as gaming or gamification</li> <li>• Use of voice-assisted programs or web-app</li> <li>• Prioritizing and focusing on only a few activities at a time</li> <li>• Demonstration and practice of the prescribed exercises</li> <li>• Written and pictorial instructions (avoid using too many colors and keep it simple and clean)</li> <li>• Videos of exercises</li> <li>• Simple written handout - no more than one printed page</li> <li>• Using a minimum of two and maximum of three mediums (various sensory modalities) when prescribing information</li> <li>• Online tracking application (feed-in everyday progress)</li> <li>• Video recording of patients' exercise performance</li> <li>• Splitting the exercise into smaller and easier steps, and gradually increasing in difficulty</li> </ul> | <p>Exercise therapist (Physiotherapist, Occupational therapists, Psychiatrist, Stroke nurse)</p> <p>Licensed psychologist trained in health behavior</p> | Patient            |
|   | <b>Domain</b>                | <b>Strategies</b>                                                                                                                                                                                                                                                                                                                                                                                                                                                                                                                                                                                                                                                                                                                                                                                                                                                                                                                                                                                                                                                                                                                                                             | <b>Healthcare provider</b>                                                                                                                               | <b>Stakeholder</b> |

|   |                                 |                                                                                                                                                                                                                                                                                                                                                                                                                                                                                                                                                                                                                                                                                                                                                                                                                                                                                                                                                                                                                                                                                                                      |                                                                                                                                                          |                    |
|---|---------------------------------|----------------------------------------------------------------------------------------------------------------------------------------------------------------------------------------------------------------------------------------------------------------------------------------------------------------------------------------------------------------------------------------------------------------------------------------------------------------------------------------------------------------------------------------------------------------------------------------------------------------------------------------------------------------------------------------------------------------------------------------------------------------------------------------------------------------------------------------------------------------------------------------------------------------------------------------------------------------------------------------------------------------------------------------------------------------------------------------------------------------------|----------------------------------------------------------------------------------------------------------------------------------------------------------|--------------------|
| 3 | <b>Feedback and supervision</b> | <ul style="list-style-type: none"> <li>• Maintaining an exercise log</li> <li>• Daily monitoring of health status and updates of patients by the medical team</li> <li>• Exercise charts - with pictures of each step and a simple breakdown of the activities</li> <li>• Clearing doubts</li> <li>• Obtaining information on progress from patients and caregivers and their experience/quality of care/interaction</li> <li>• Evaluate frequency, form, intensity, and duration of exercise</li> <li>• Maintaining some form of regular contact with therapists - in person or via telehealth</li> <li>• Online web applications that can be accessed by the patients, caregivers, and medical team for recording everyday health status</li> <li>• Recorded audio/video clips to guide the exercise session</li> <li>• Individual and group discussion</li> <li>• Internal feedback</li> <li>• Providing verbal/manual cues at salient points during the exercise, and asking the person what went right and what could be improved</li> <li>• Standardized assessment using clinical outcome measures</li> </ul> | <p>Exercise therapist (Physiotherapist, Occupational therapists, Psychiatrist, Stroke nurse)</p> <p>Licensed psychologist trained in health behavior</p> | Patient            |
|   | <b>Domain</b>                   | <b>Strategies</b>                                                                                                                                                                                                                                                                                                                                                                                                                                                                                                                                                                                                                                                                                                                                                                                                                                                                                                                                                                                                                                                                                                    | <b>Healthcare provider</b>                                                                                                                               | <b>Stakeholder</b> |
| 4 | <b>Cognitive remediation</b>    | <ul style="list-style-type: none"> <li>• Prescribing functional tasks and planning the exercises focusing on patients' goals</li> <li>• Understanding the exercise behavior of the patient before the treatment session</li> <li>• Educating the patients and caregivers about the benefits of performing exercises</li> <li>• Incorporating a schedule, involving group sessions, and relevant tasks</li> <li>• Positive feedback, reinforcement, and giving importance to micro gains</li> <li>• Assessing intention to exercises-use of Motivation Enhancement Therapy or motivational interviewing</li> <li>• Contingency charts and behavioral activation</li> </ul>                                                                                                                                                                                                                                                                                                                                                                                                                                            | <p>Licensed psychologist trained in health behavior</p> <p>Exercise therapist (Physiotherapist, Occupational therapists, Psychiatrist, Stroke nurse)</p> | Patient, caregiver |

|   | Domain                                   | Strategies                                                                                                                                                                                                                                                                                                                                                                                                                                                                                                                                                                                                                                                                                                                                                                                                                                                                                                                                                                                                                                                                                                                                                                                                                                                                         | Healthcare provider                                                                                                                                     | Stakeholder |
|---|------------------------------------------|------------------------------------------------------------------------------------------------------------------------------------------------------------------------------------------------------------------------------------------------------------------------------------------------------------------------------------------------------------------------------------------------------------------------------------------------------------------------------------------------------------------------------------------------------------------------------------------------------------------------------------------------------------------------------------------------------------------------------------------------------------------------------------------------------------------------------------------------------------------------------------------------------------------------------------------------------------------------------------------------------------------------------------------------------------------------------------------------------------------------------------------------------------------------------------------------------------------------------------------------------------------------------------|---------------------------------------------------------------------------------------------------------------------------------------------------------|-------------|
| 5 | <b>Involvement of the family members</b> | <ul style="list-style-type: none"> <li>• The family must be involved for a limited amount since it encourages dependency</li> <li>• Management of expressed emotions of the family members that may hinder treatment and restrict the autonomy of the patient</li> <li>• Evaluating caregivers' burden and having frequent sessions to reduce the burnout and to encourage their efforts towards the patient</li> <li>• Assessing knowledge and understanding of the caregivers on the importance of post-stroke exercises</li> <li>• Family can provide emotional support and encouragement</li> <li>• Exercise buddies</li> <li>• Setting up reminders on the patients' phone for anchor points of the day (daily routines/meals/exercise/leisure activities/family time/planned activities)</li> <li>• Developing, demonstrating, and practicing activities with family</li> <li>• Reinforcing adaptive behaviors</li> <li>• Assisting in exercises and preventing complications</li> <li>• Designing a few exercises that involve family members</li> <li>• Rotation of family members for caregiving roles (reduces burnout, improves support, and maintains novelty)</li> <li>• Tracking the progress and delivering rewards to the patient - tangible/intangible</li> </ul> | <p>Licensed psychologist trained in health behavior</p> <p>Exercise therapist (Physiotherapist, Occupational therapists, Physiatrist, Stroke nurse)</p> | Caregiver   |
|   | Domain                                   | Strategies                                                                                                                                                                                                                                                                                                                                                                                                                                                                                                                                                                                                                                                                                                                                                                                                                                                                                                                                                                                                                                                                                                                                                                                                                                                                         | Healthcare provider                                                                                                                                     | Stakeholder |
| 6 | <b>Involvement of society</b>            | <ul style="list-style-type: none"> <li>• Interaction with colleagues on topics not concerning the illness (preferably the patient's work/politics/current affairs/sports)</li> <li>• Weekly scheduled interactions (phone/face-to-face) with friends, neighbors or colleagues</li> <li>• Creating an association of families caring for stroke or support group</li> </ul>                                                                                                                                                                                                                                                                                                                                                                                                                                                                                                                                                                                                                                                                                                                                                                                                                                                                                                         | <p>Licensed psychologist trained in health behavior</p> <p>Exercise therapist (Physiotherapist, Occupational therapists, Physiatrist, Stroke</p>        | Community   |

|   |                                |                                                                                                                                                                                                                                                                                                                                                                                                                                                                                                                                                                                                                                                                                                                                                                                                                                                                                                                                                                                                                                                                                                                                                                                                                                                                                                                                                                                                                                                  |                                                                                                                                                          |                    |
|---|--------------------------------|--------------------------------------------------------------------------------------------------------------------------------------------------------------------------------------------------------------------------------------------------------------------------------------------------------------------------------------------------------------------------------------------------------------------------------------------------------------------------------------------------------------------------------------------------------------------------------------------------------------------------------------------------------------------------------------------------------------------------------------------------------------------------------------------------------------------------------------------------------------------------------------------------------------------------------------------------------------------------------------------------------------------------------------------------------------------------------------------------------------------------------------------------------------------------------------------------------------------------------------------------------------------------------------------------------------------------------------------------------------------------------------------------------------------------------------------------|----------------------------------------------------------------------------------------------------------------------------------------------------------|--------------------|
|   |                                | <ul style="list-style-type: none"> <li>• Testimonials of recovered patients and their experiences about rehabilitation</li> <li>• Awareness programs for healthy adults</li> <li>• Group exercise for stroke survivors in that particular locality</li> <li>• Peer support or exercise buddies</li> </ul>                                                                                                                                                                                                                                                                                                                                                                                                                                                                                                                                                                                                                                                                                                                                                                                                                                                                                                                                                                                                                                                                                                                                        | nurse)                                                                                                                                                   |                    |
|   | <b>Domain</b>                  | <b>Strategies</b>                                                                                                                                                                                                                                                                                                                                                                                                                                                                                                                                                                                                                                                                                                                                                                                                                                                                                                                                                                                                                                                                                                                                                                                                                                                                                                                                                                                                                                | <b>Healthcare provider</b>                                                                                                                               | <b>Stakeholder</b> |
| 7 | <b>Promoting self-efficacy</b> | <ul style="list-style-type: none"> <li>• Use of evidence-based behavior change strategies (e.g., the Capacity Opportunity Motivation-Behavior model, or Intervention Mapping or Coaching Methodology)</li> <li>• Using substitution and optimization principles</li> <li>• Working out with patients on what monitoring will be best for them - exercise practice sheet, paper diary, electronic diary, app</li> <li>• Providing ongoing support once the therapy program has ended</li> <li>• Personal graph chart of success that can be generated weekly or monthly</li> <li>• Ensuring an adequate number of activities in which the patient can engage independently or with minimal supervision and support from the caregivers</li> <li>• Setting reminders on the phone or alarms on the clock; identifying anchors in the day (sleep times/meals/activities - exercise, recreation, social)</li> <li>• Setting a general intention of sticking to their exercise program with more specific goals (i.e., intention and "if/then" plans)</li> <li>• Patients could be advised to think of barriers that would impede their exercise sessions, and list ways of overcoming such barriers</li> <li>• Use of pie-charts/pros-con analysis/identification of cognitive distortions/downward arrow techniques for problem analysis and developing a life brochure and art-based therapeutic activities for promoting self-efficacy</li> </ul> | <p>Licensed psychologist trained in health behavior</p> <p>Exercise therapist (Physiotherapist, Occupational therapists, Psychiatrist, Stroke nurse)</p> | Patient            |

|   | Domain                  | Strategies                                                                                                                                                                                                                                                                                                                                                                                                                                                                                                                                                                                                                                                                                                                                                                                                                                                                                                                                                                                                                                                                                                                                                                                                                                                                                                                                                                                                                                                                                                                                                                                                                                                                                              | Healthcare provider                                                                                                                                      | Stakeholder |
|---|-------------------------|---------------------------------------------------------------------------------------------------------------------------------------------------------------------------------------------------------------------------------------------------------------------------------------------------------------------------------------------------------------------------------------------------------------------------------------------------------------------------------------------------------------------------------------------------------------------------------------------------------------------------------------------------------------------------------------------------------------------------------------------------------------------------------------------------------------------------------------------------------------------------------------------------------------------------------------------------------------------------------------------------------------------------------------------------------------------------------------------------------------------------------------------------------------------------------------------------------------------------------------------------------------------------------------------------------------------------------------------------------------------------------------------------------------------------------------------------------------------------------------------------------------------------------------------------------------------------------------------------------------------------------------------------------------------------------------------------------|----------------------------------------------------------------------------------------------------------------------------------------------------------|-------------|
| 8 | Motivational strategies | <ul style="list-style-type: none"> <li>Tracking and reporting exercise adherence</li> <li>Showing functional improvement</li> <li>Measuring performance-repetitions, duration of exercise, exercise intensity, or distance walked</li> <li>Positive feedback mechanisms at home with the help of caregivers to reward adherence and home activities</li> <li>Importance to micro gains</li> <li>Reminding positive experiences with exercise before a stroke</li> <li>Measuring functional improvements using clinical measures that can help patients appreciate improvements in their health</li> <li>Telehealth, self-monitoring, diaries</li> <li>Devise individual graphs (every three sessions plus monthly)</li> <li>Have a display board/wall of fame where "patient of the month" and photos of patients achieving good outcomes is displayed online or in clinical setup</li> <li>Telephonic follow-up where the medical team provides words of encouragement</li> <li>Productivity monitor that has to be filled out by the patient to code the level of functioning for every day in various domains</li> <li>Maintaining a positive log (paper-pencil or online) two events each day gave the patient a reason to be happy</li> <li>Feedback at regular intervals using objective outcomes</li> <li>Setting progressive but achievable targets and involving patients in goal setting</li> <li>Devising color bands (coded for level of recovery and mastery of tasks). Reinforcing the patients by providing t-shirts or color bands of a particular color that represents certain level of recovery or mastery of task. Upgradation of color bands with progression of tasks.</li> </ul> | <p>Licensed psychologist trained in health behavior</p> <p>Exercise therapist (Physiotherapist, Occupational therapists, Psychiatrist, Stroke nurse)</p> | Patient     |

|          |                            |                                                                                                                                                                                                                                                                                                                                                                                                                                                                                                                                                                                                                                                                                                                                                                                                                                                                                                                                                                                                                                                                                                                                                   |                                                                                          |                    |
|----------|----------------------------|---------------------------------------------------------------------------------------------------------------------------------------------------------------------------------------------------------------------------------------------------------------------------------------------------------------------------------------------------------------------------------------------------------------------------------------------------------------------------------------------------------------------------------------------------------------------------------------------------------------------------------------------------------------------------------------------------------------------------------------------------------------------------------------------------------------------------------------------------------------------------------------------------------------------------------------------------------------------------------------------------------------------------------------------------------------------------------------------------------------------------------------------------|------------------------------------------------------------------------------------------|--------------------|
|          |                            | <ul style="list-style-type: none"> <li>• Conducting intra-group competitions for patients (within a given color band) during group sessions</li> <li>• Providing tokens and badges for improvement - which can be exchanged for tangible rewards</li> <li>• Interactive community - can add friends to motivate each other using web app or in community centers</li> </ul>                                                                                                                                                                                                                                                                                                                                                                                                                                                                                                                                                                                                                                                                                                                                                                       |                                                                                          |                    |
|          | <b>Domain</b>              | <b>Strategies</b>                                                                                                                                                                                                                                                                                                                                                                                                                                                                                                                                                                                                                                                                                                                                                                                                                                                                                                                                                                                                                                                                                                                                 | <b>Healthcare provider</b>                                                               | <b>Stakeholder</b> |
| <b>9</b> | <b>Reminder strategies</b> | <ul style="list-style-type: none"> <li>• Calling them on a regular basis and visiting them weekly or fortnightly</li> <li>• Tally sheet, mobile applications, pamphlets, SMS reminders or WhatsApp reminders</li> <li>• Using videos to show exercise steps and giving the same material for home practice</li> <li>• Auditory - use voice recording during the exercise session so that the patient can use the same tapes at home during practice</li> <li>• Alarms/music clips to indicate the time to switch between exercises</li> <li>• Technology - sending small surveys about feedback, information, some scientific literature, and progress card</li> <li>• Daily logs - either electronic or paper-pencil to track mood, exercise, food intake, sleep, social engagement, and grooming activities</li> <li>• Audio – alarms to orient patient to engage in tasks and taking medications.</li> <li>• Weekly reviewing the exercise log</li> <li>• Cues/prompts such as sticky notes in the patients' homes</li> <li>• Follow-up phone calls from the health care professionals</li> <li>• Visible wall posters on exercises</li> </ul> | Exercise therapist (Physiotherapist, Occupational therapists, Physiatrist, Stroke nurse) | Patient, caregiver |
